# Supplementary material for: BMSC-Derived Exosomes Ameliorate Osteoarthritis by Inhibiting Pyroptosis of Cartilage via Delivering miR-326 Targeting HDAC3 and STAT1//NF-κB p65 to Chondrocytes
Source: Mediators Inflamm. 2021 Nov 2;2021:9972805. doi: 10.1155/2021/9972805 (PMC8577926; doi:10.1155/2021/9972805)
Supplement: Supplementary Materials — Supplementary Table 1 is the primer sequences used for quantitative RT-PCR, and Supplementary Table 2 is the macroscopic evaluation criteria of (International Society for Chondroprosthesis) ICRS for cartilage repair. [file 9972805.f1.zip]

Archive with 2 entries (2 files):
- 9972805.f1.docx
- 9972805.f2.docx
